# Supplementary material
Source: publisher figshare collection journal article supplement (https://acs.figshare.com/ndownloader/files/20098919)
Supplement: Supplementary file 1 [file 20098919]

# Dynamic model of batch enzymatic reactive distillation for the production of R-2-pentyl butyrate

## SUPPORTING INFORMATION

*Michał Blatkiewicz<sup>\*‡</sup>, Fynn Mißfeldt<sup>‡</sup>, Irina Smirnova*

Hamburg University of Technology, Institute of Thermal Separation Processes, Eißendorfer Straße 38 (O),  
21073 Hamburg

---

<sup>\*</sup> Corresponding author, email: [michal.blatkiewicz@tuhh.de](mailto:michal.blatkiewicz@tuhh.de)

<sup>‡</sup> These authors contributed equally

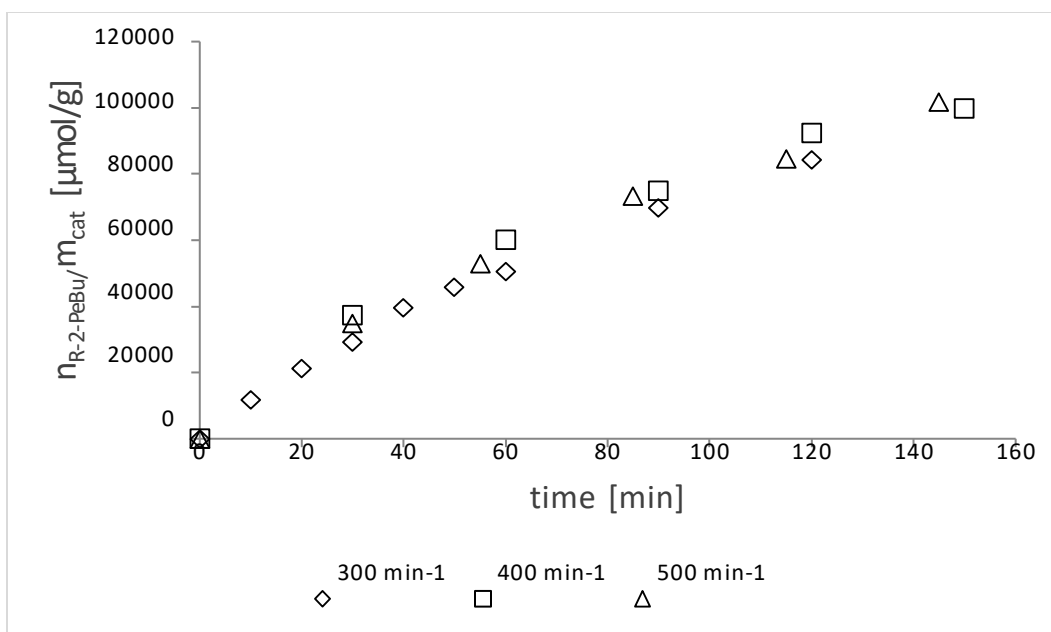

**Figure S1:** Production of R-2-PeBu with varying stirring speeds in kinetic measurement setup at 60 °C with a starting composition of  $x_{\text{EtBu}}=0.5$ ,  $x_{\text{R-2-PeOH}}=0.25$ ,  $x_{\text{S-2-PeOH}}=0.25$

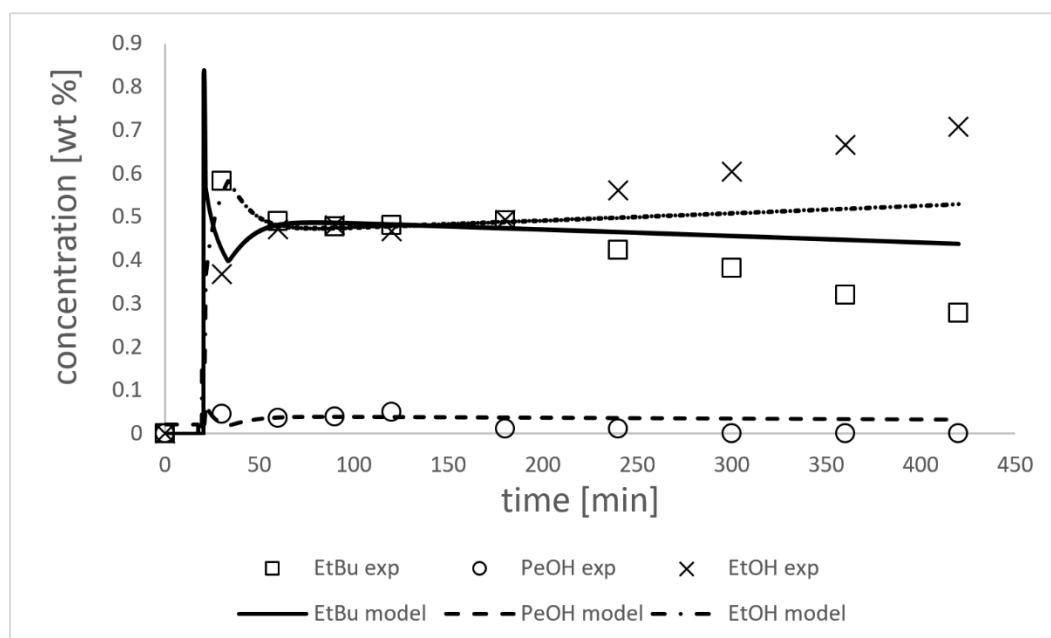

**Figure S2:** Reactants' concentrations in the distillate stream over time with simulated reflux ratio set at 10 for the whole process

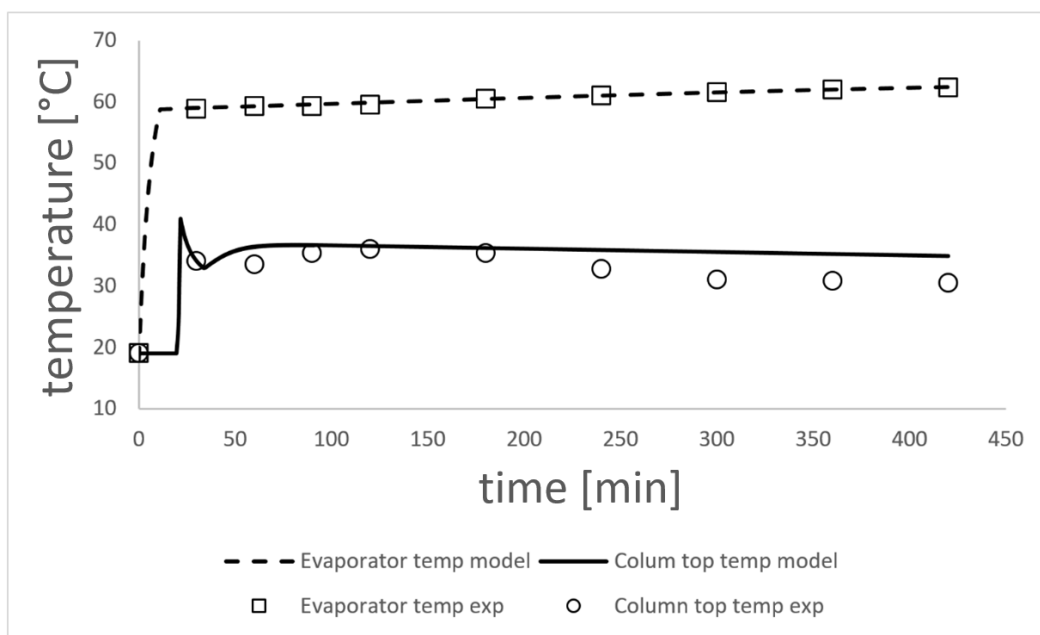

**Figure S3:** Temperatures of the evaporator and the vapor at the top of the column over time with simulated reflux ratio set at 10 for the whole process

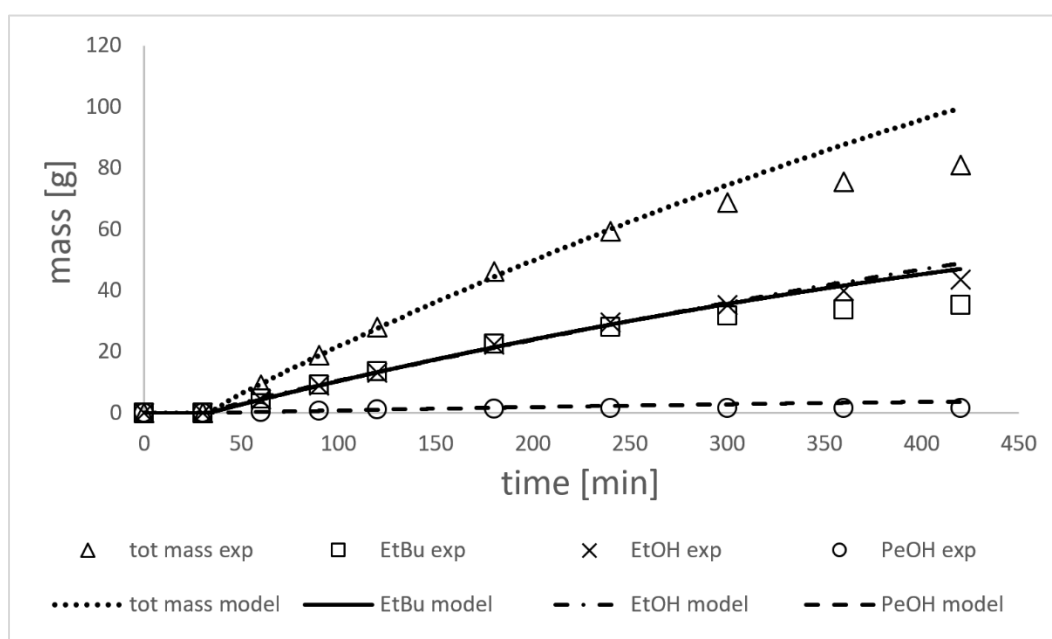

**Figure S4:** Mass increase in the collection vessel over time with simulated reflux ratio set at 10 for the whole process
